# Supplementary material for: Quantification and Chemical Characterization of Plastic Additives and Small Microplastics (<100 μm) in Highway Road Dust
Source: MDPI journal article supplement (doi:10.3390/toxics11110936), 2023-11-17
Supplement: s1 [file s1]

# **Quantification and chemical characterization of plastic additives and small microplastics (<100 µm) in highway road dust**

**Beatrice Rosso, Barbara Bravo, Elena Gregoris, Carlo Barbante, Andrea Gambaro, Fabiana Corami**

## **S1 List of libraries employed with Micro-FTIR**

- Synthetic fibers by Microscope
- Plastic Fibers
- Polymer additives and plasticizers
- HR Polymer additive and plasticizers
- HR Hummel Polymer and plasticizers
- Common materials
- HR Nicolet Sampler Library
- HR Sprouse Polymer additives
- HR rubber compounding materials

## **Figures in Supplementary Materials**

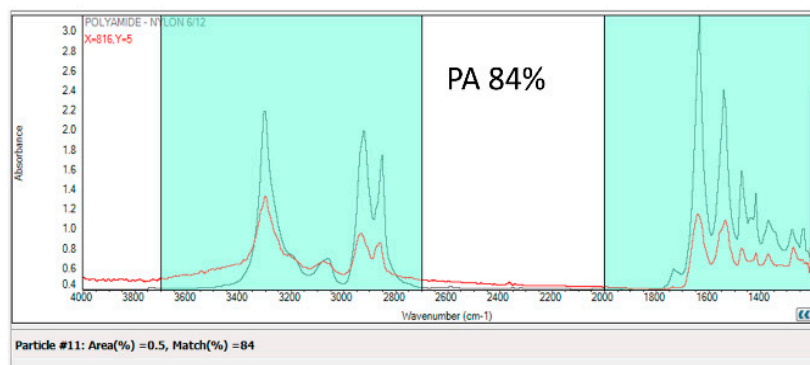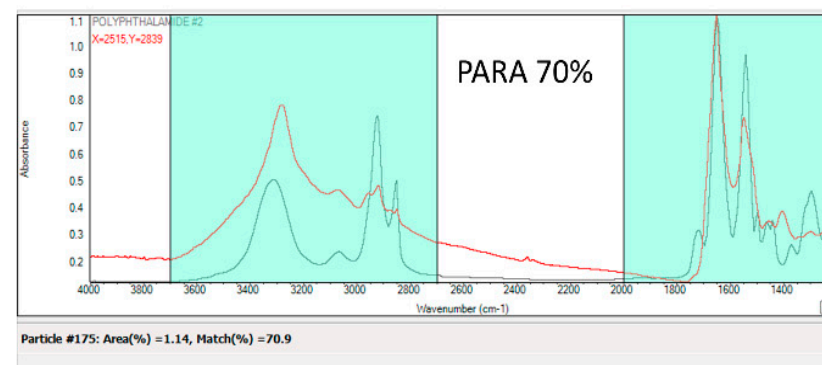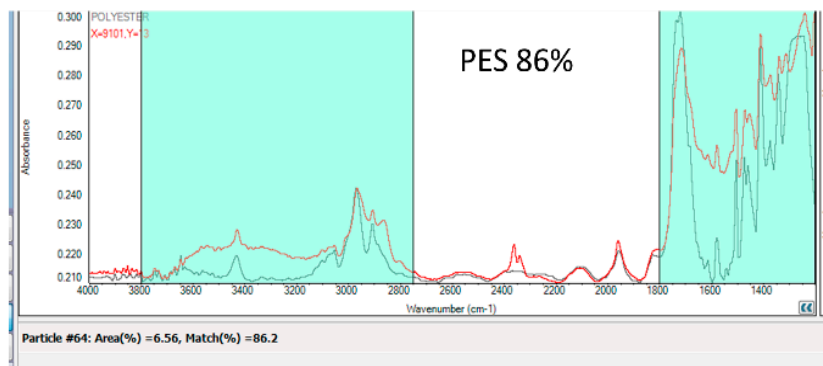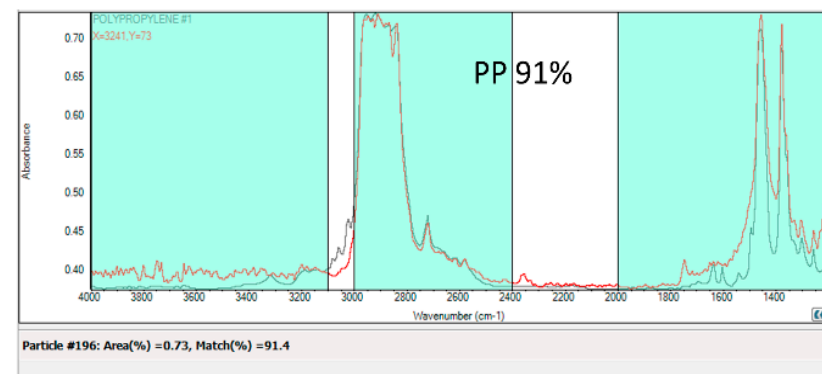

**Fig. S1: Some of the best spectra of the polymers observed in the samples. A match percentage higher than 65% indicates that the polymer spectrum was optimally identified.**

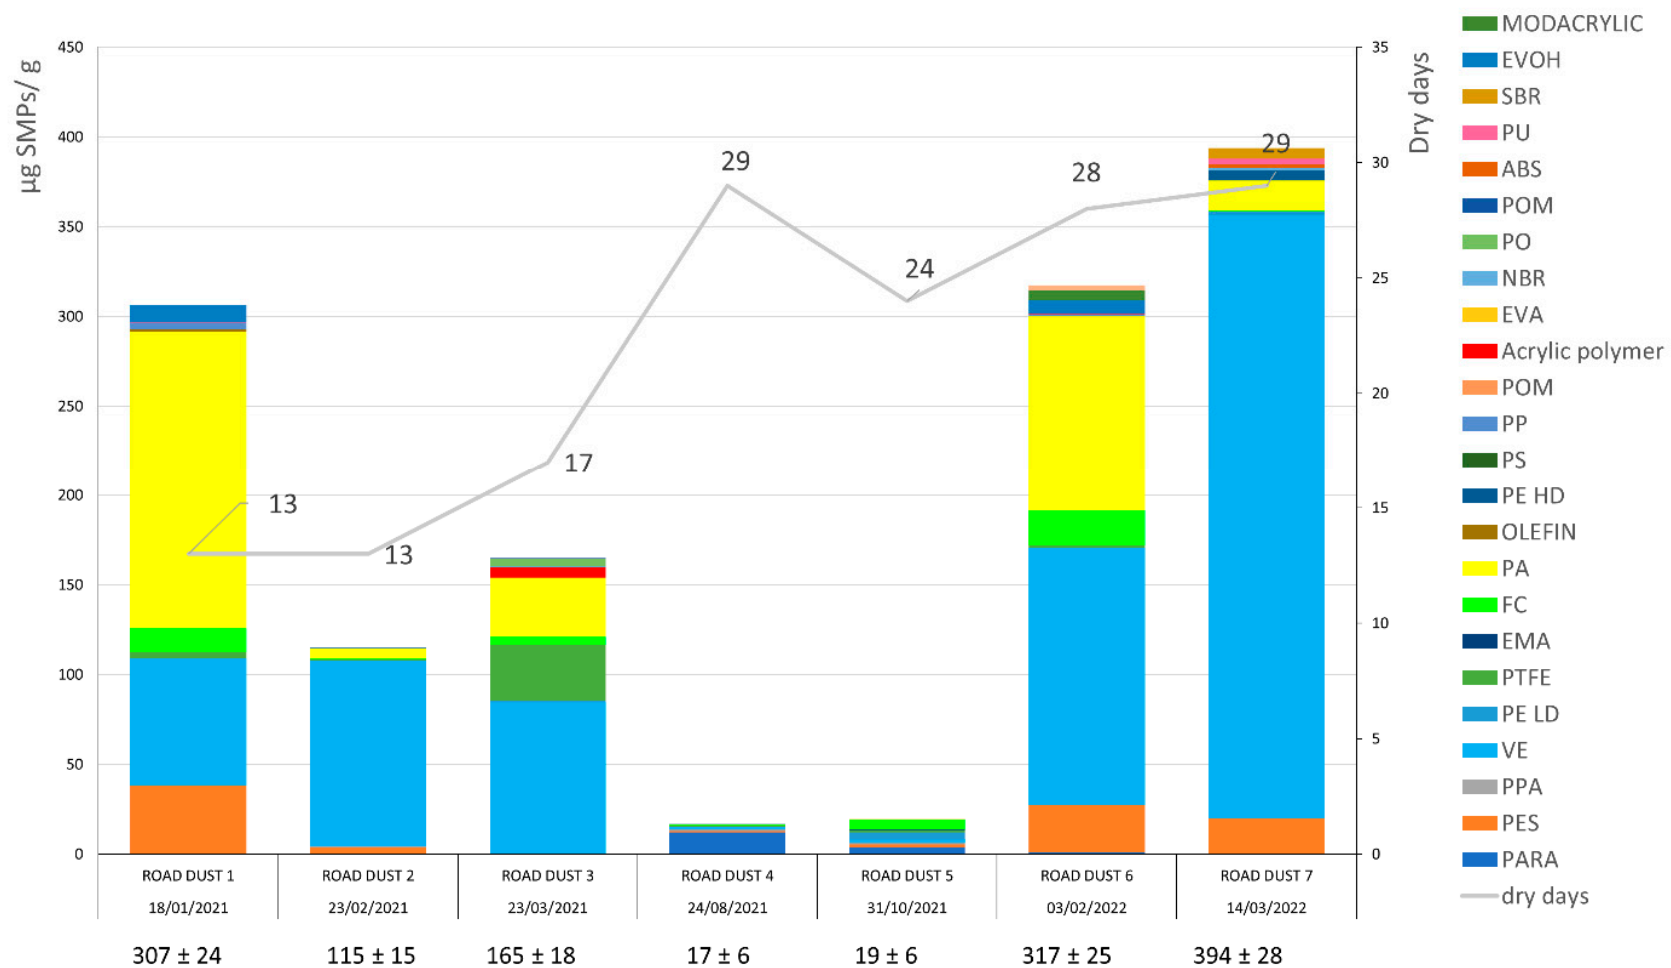

**Fig. S2 Weight of SMPs( $\mu\text{g/g}$ ) in the HWRD samples analyze**

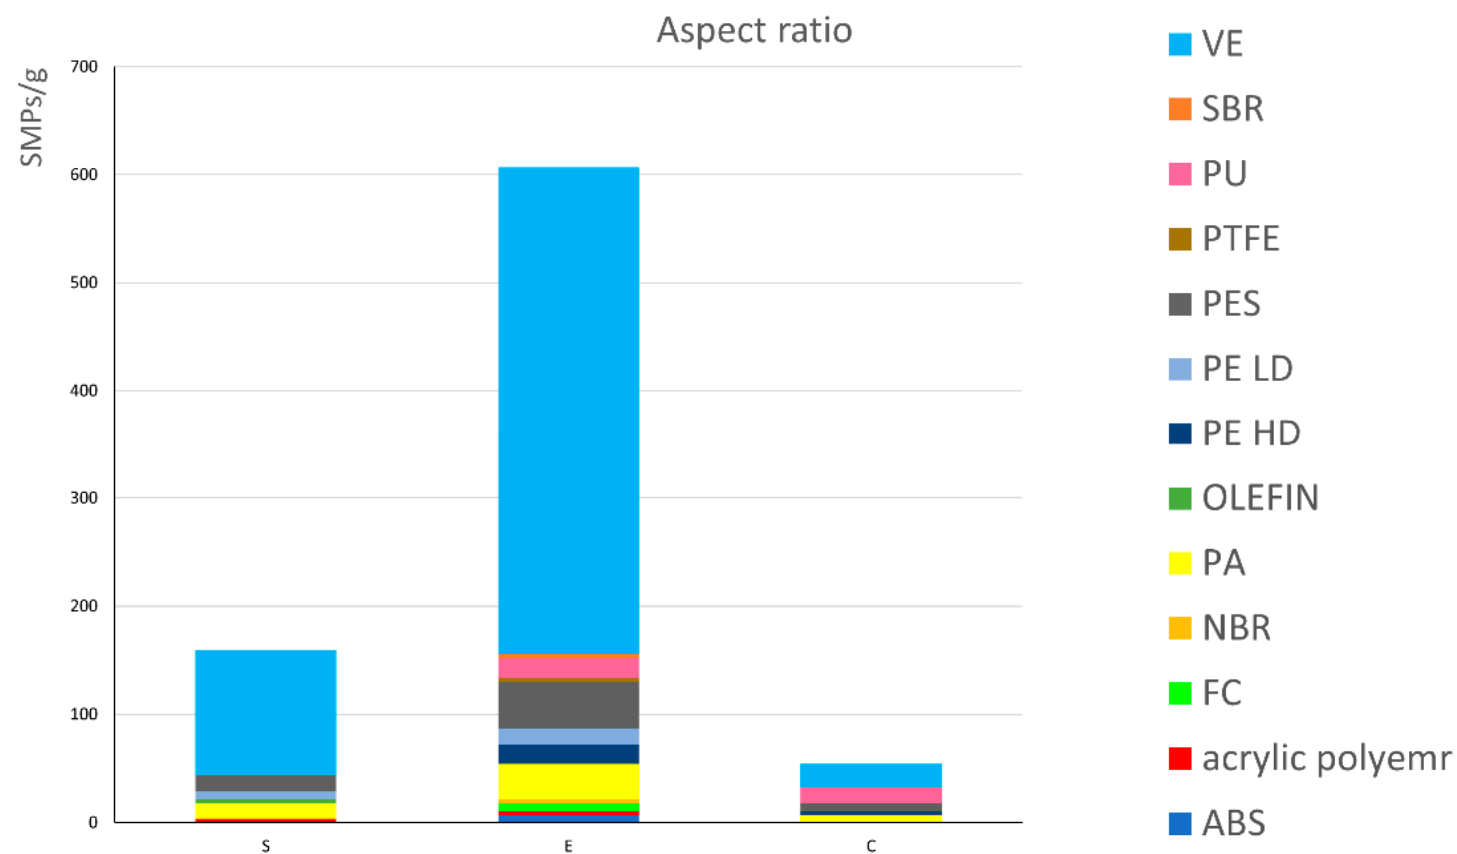

**Fig. S3 Ellipsoid (extrapolated from AR) being the most common shape for SMPs in HWRD. When AR =1, particles are considered spherical (S), while when AR =2, particles are elongated/ellipsoidal (E), and they are considered elliptical. When  $AR \geq 3$ , particles are considered cylindrical (C).**

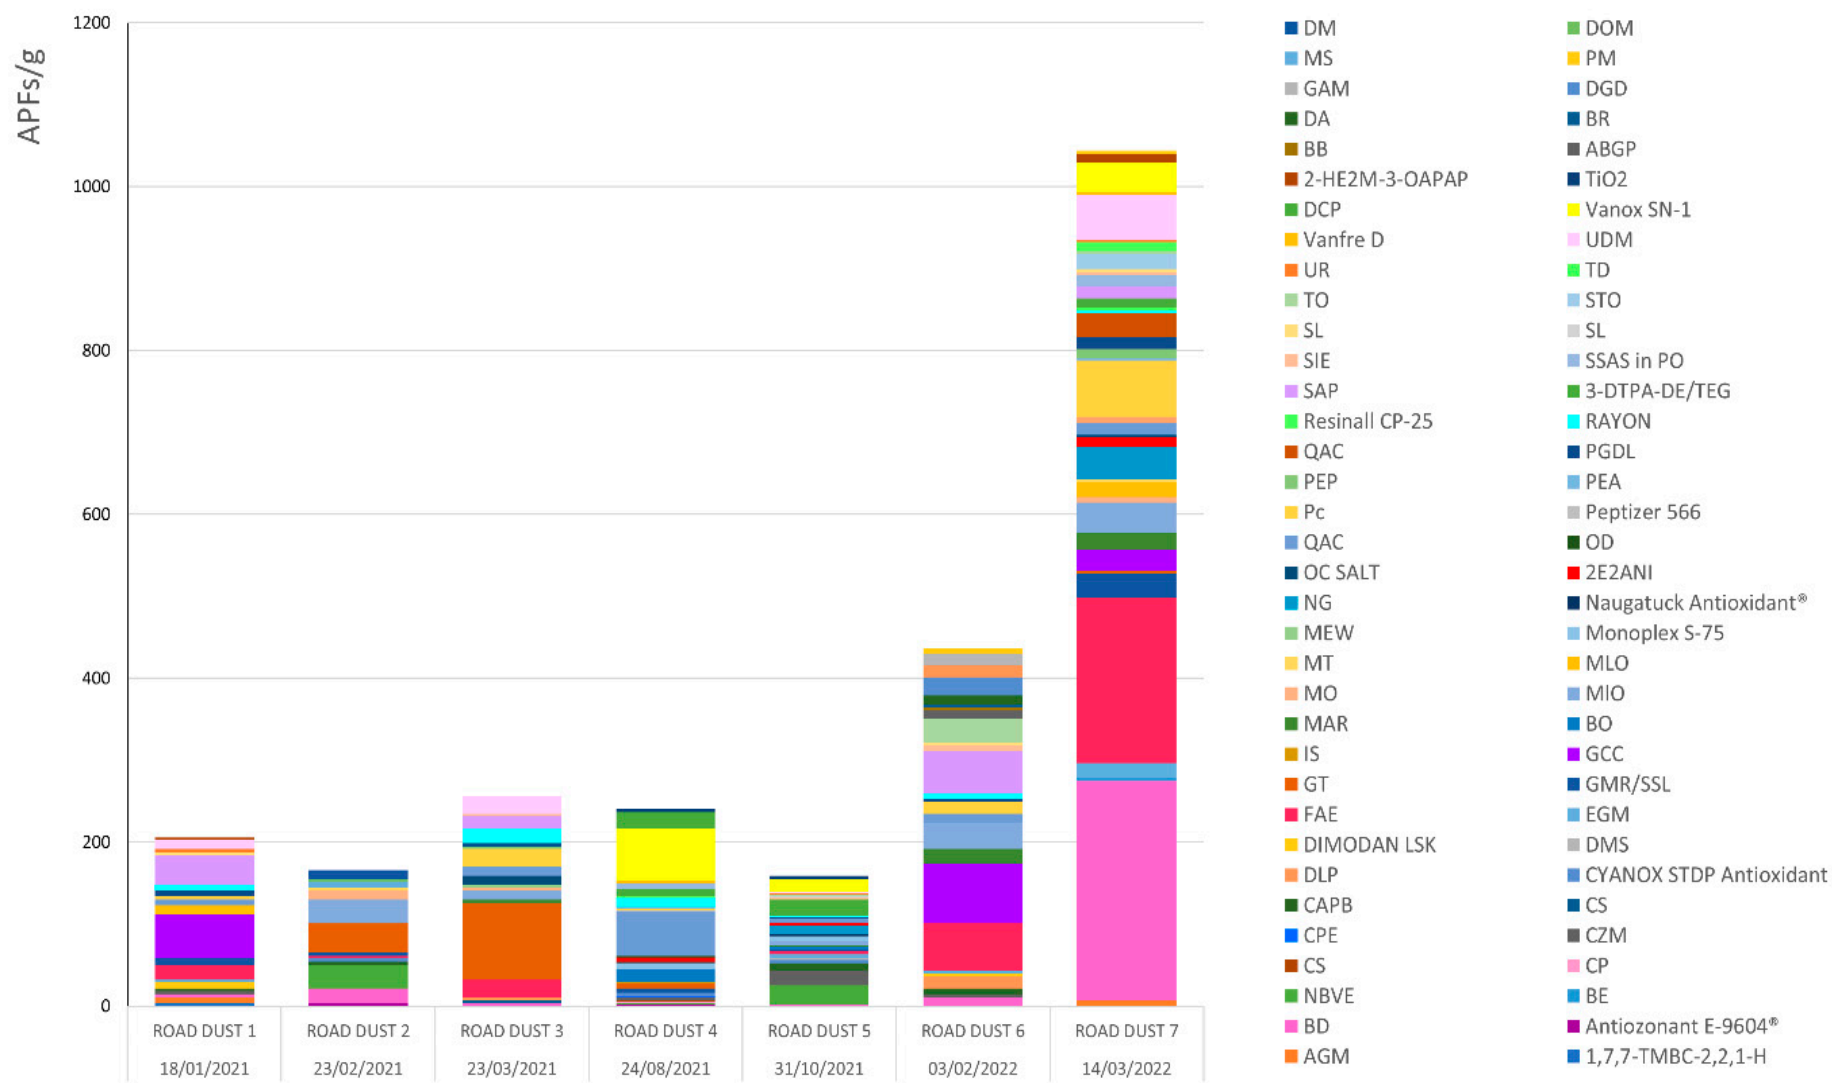

**Fig. S4 APFs' abundance (APFS/g) with the list of all singular APFs analyzed in all the HWRD samples**

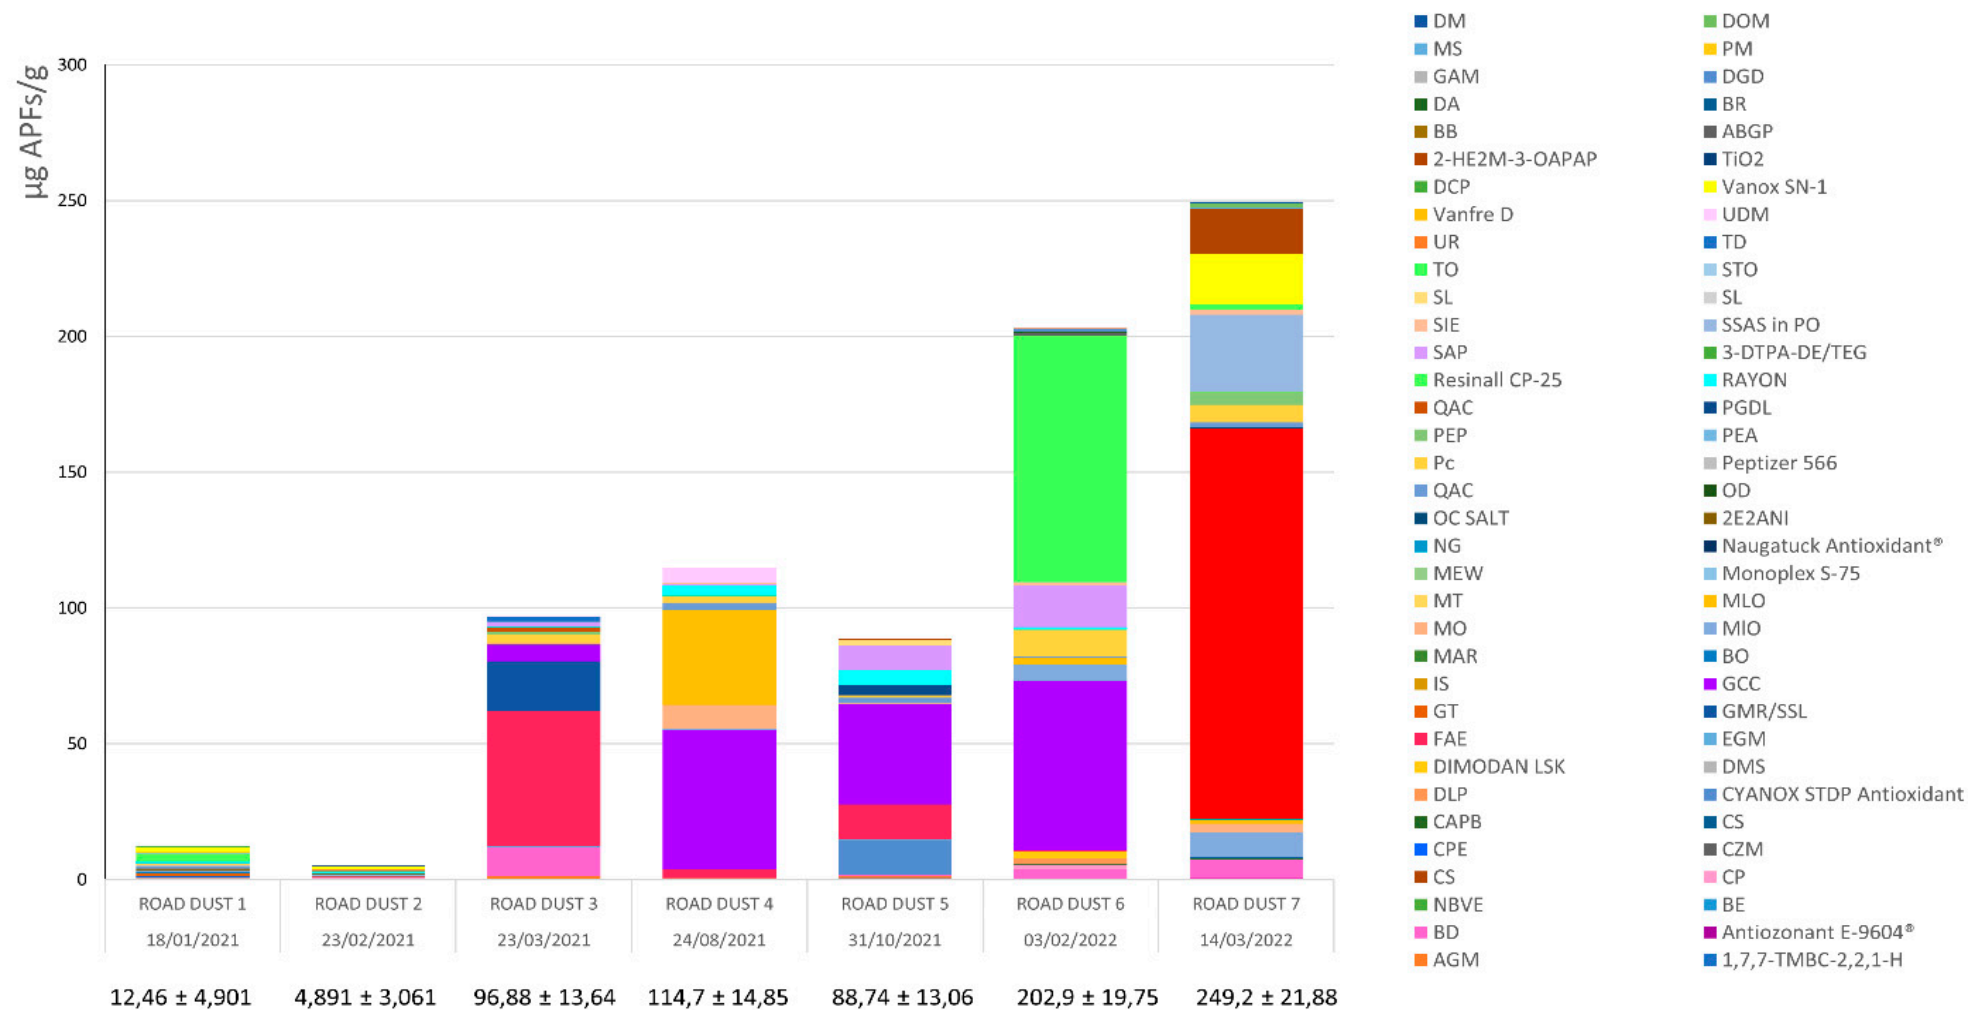

**Fig. S5 Weight of APFs (µg/g) in all HWRD samples analyze**

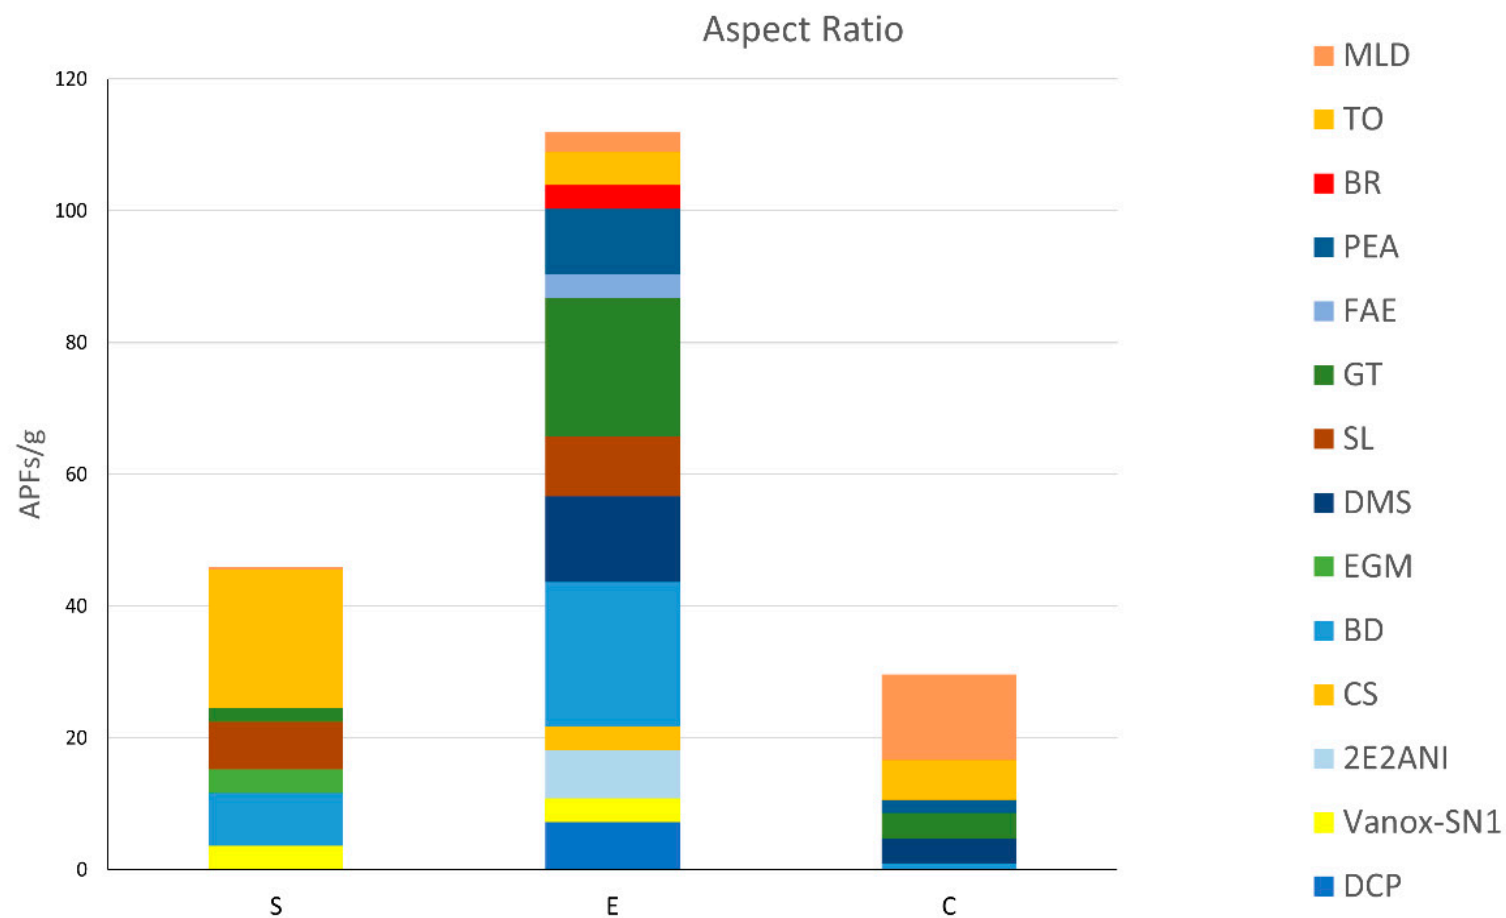

**Fig. S6 Ellipsoid (extrapolated from AR) being the most common shape for APFs in HWRD. When AR =1, particles are considered spherical (S), while when AR =2, particles are elongated/ellipsoidal (E), and they are considered elliptical. When  $AR \geq 3$  particles are considered cylindrical (C).**
